# Supplementary material for: The Landscape of Gene Expression during Hyperfilamentous Biofilm Development in Oral Candida albicans Isolated from a Lung Cancer Patient
Source: MDPI journal article supplement (doi:10.3390/ijms24010368), 2022-12-26
Supplement: s1 [file s1]

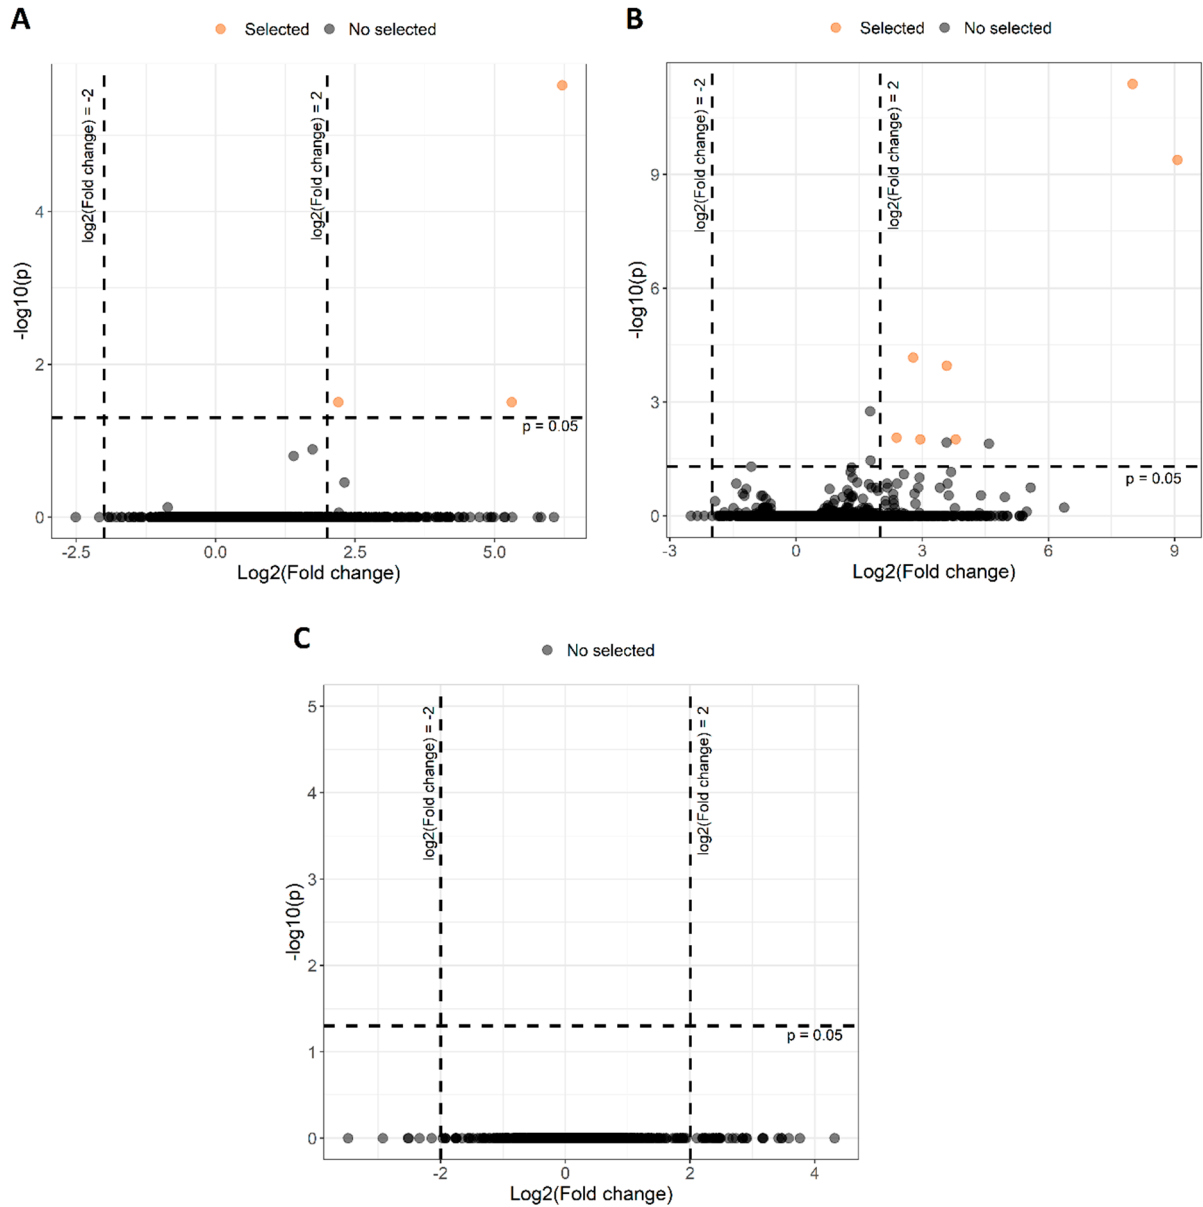

**Figure S2.** Volcano plots showing the arrangement of negative log<sub>10</sub> of P values and log<sub>2</sub> fold changes for 6,282 differentially expressed genes in (A) 24 h vs. 48 h comparison, (B) 72 h vs. 24 h comparison, and (C) 72 h vs. 48 h comparison. Genes marked as 'Selected' met three established selection criteria: mean of read counts above 100 across samples belonging to the compared groups, Benjamini-Hochberg adjusted P value below 0.05 and absolute log<sub>2</sub>(fold change) value above 2.
