# Supplementary material for: The Landscape of Gene Expression during Hyperfilamentous Biofilm Development in Oral Candida albicans Isolated from a Lung Cancer Patient
Source: MDPI journal article supplement (doi:10.3390/ijms24010368), 2022-12-26
Supplement: s1 [file s1]

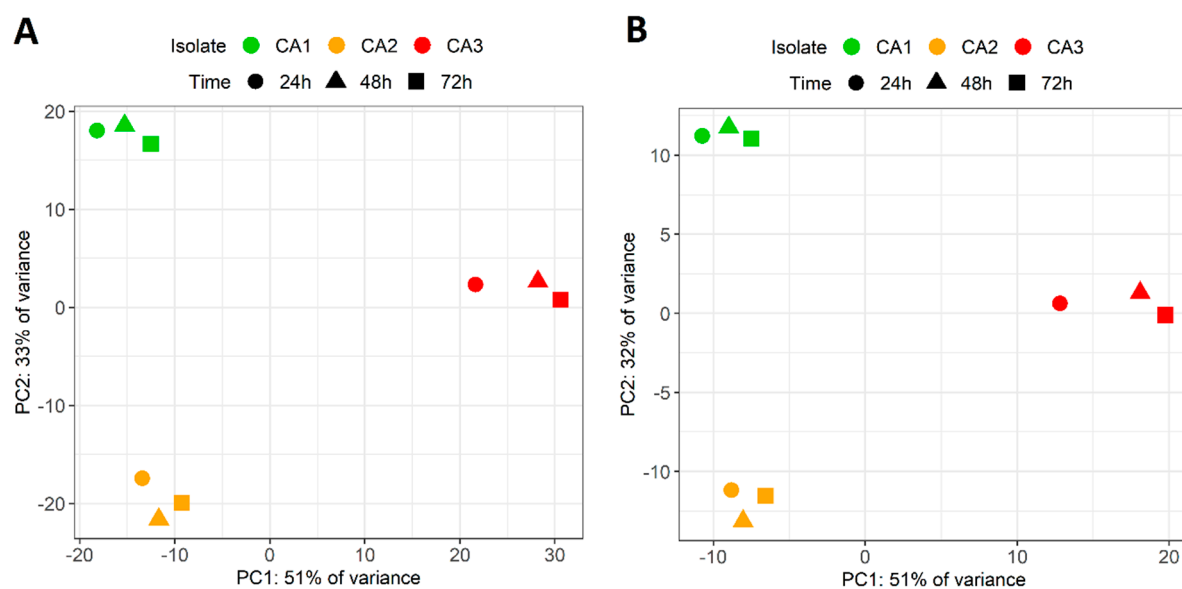

**Figure S5.** PCA plot of normalized and transformed (regularized log transformation) expression data of all genes analyzed in the studied samples using (A) isolates as a condition and (B) times of incubation as a condition.
