# Supplementary material for: The Landscape of Gene Expression during Hyperfilamentous Biofilm Development in Oral Candida albicans Isolated from a Lung Cancer Patient
Source: MDPI journal article supplement (doi:10.3390/ijms24010368), 2022-12-26
Supplement: s1 [file s1]

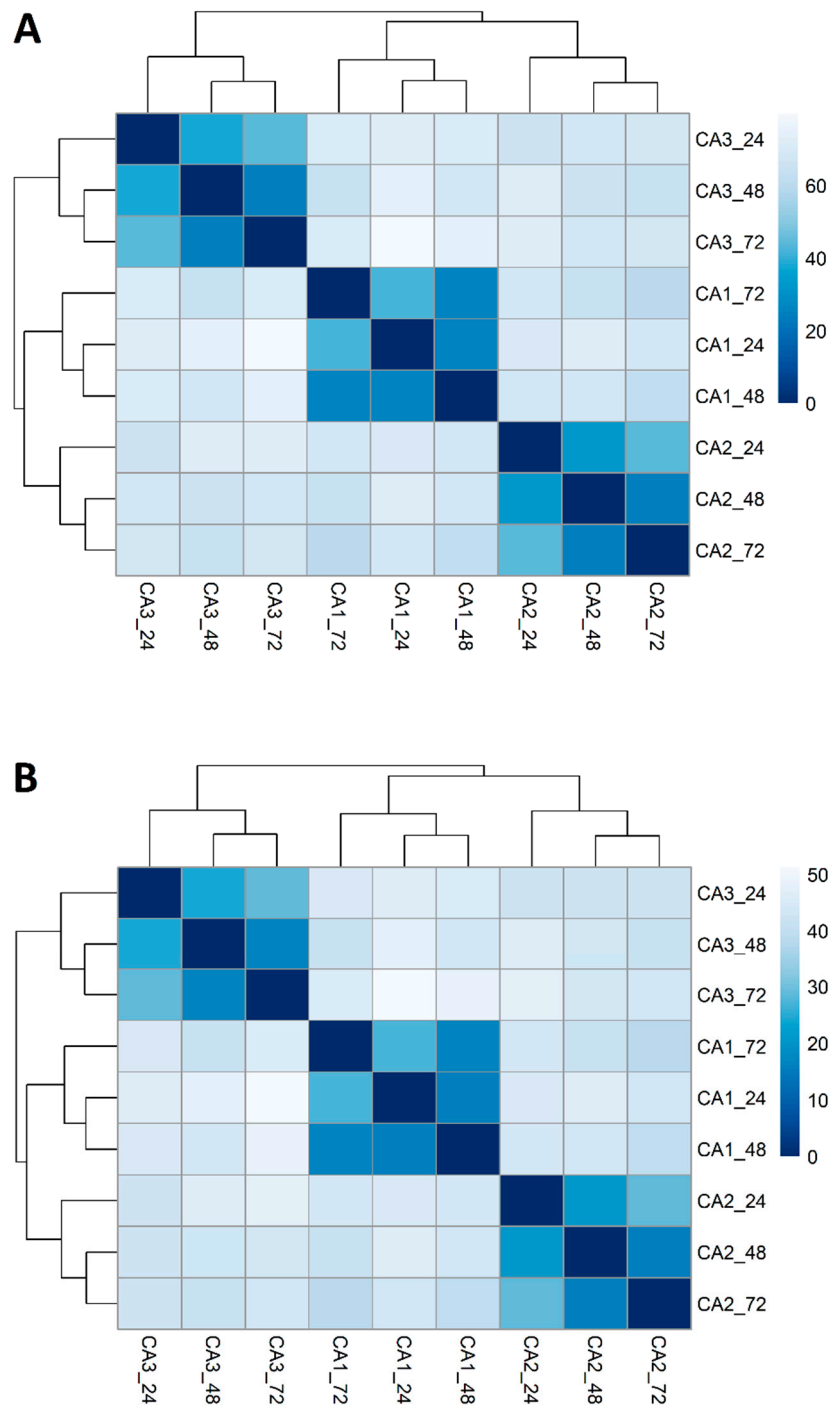

**Figure S6.** Heatmap of Euclidean distances clustering calculated for normalized and transformed (regularized log transformation) expression data of all genes analyzed in each samples using (A) isolates as a condition and (B) times of incubation as a condition. The first part of sample names indicates isolate (CA1, CA2, and CA3) and the second part of sample names indicates time of incubation (24 h, 48 h, and 72 h).
