# Supplementary material for: The Landscape of Gene Expression during Hyperfilamentous Biofilm Development in Oral Candida albicans Isolated from a Lung Cancer Patient
Source: MDPI journal article supplement (doi:10.3390/ijms24010368), 2022-12-26
Supplement: s1 [file s1]

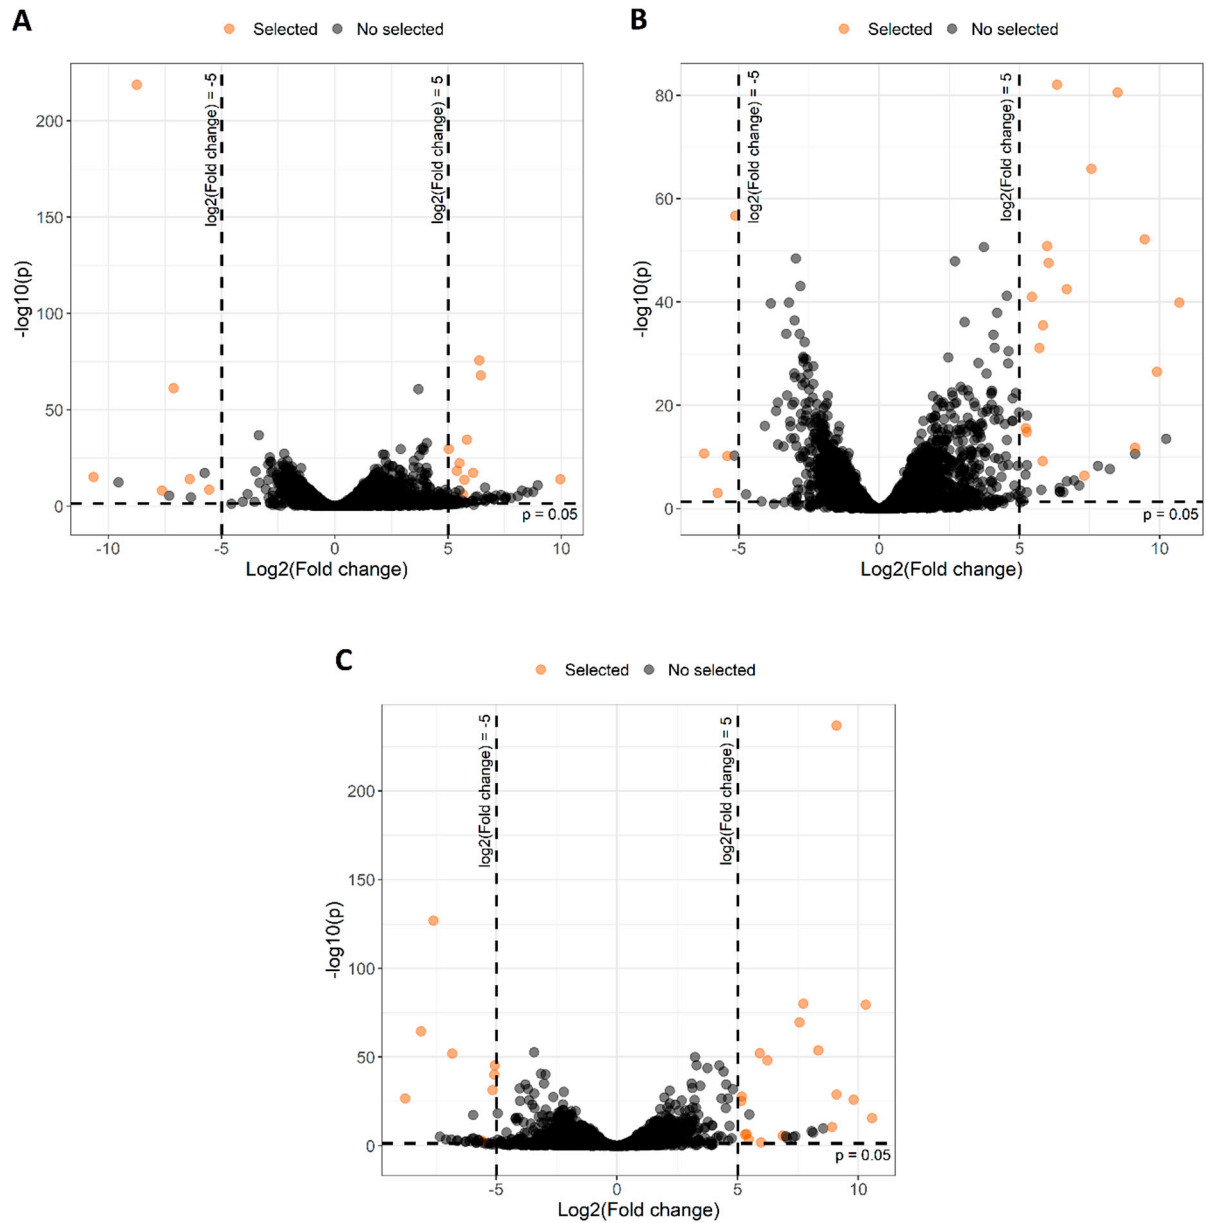

**Figure S1.** Volcano plots showing the arrangement of negative log<sub>10</sub> of P values and log<sub>2</sub> fold changes for 6,359 differentially expressed genes in (A) CA2 vs. CA1 comparison, (B) CA3 vs. CA1 comparison, and (C) CA3 vs. CA2 comparison. Genes marked as 'Selected' met three established selection criteria: mean of read counts above 100 across samples belonging to the compared groups, Benjamini-Hochberg adjusted P value below 0.05 and absolute log<sub>2</sub>(fold change) value above 5.
