# Supplementary figures and images for: The Landscape of Gene Expression during Hyperfilamentous Biofilm Development in Oral Candida albicans Isolated from a Lung Cancer Patient
Source: MDPI journal article supplement (doi:10.3390/ijms24010368), 2022-12-26

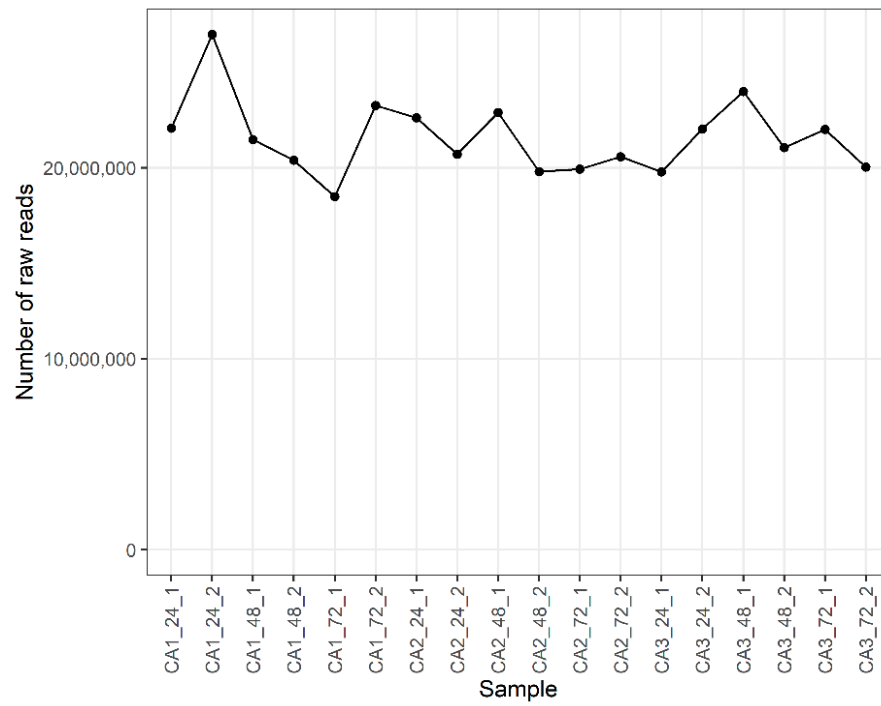

**Figure S3.** Numbers of raw reads obtained from the studied samples using RNA sequencing.

Supplement: s1 [file s1]
